# Supplementary material
Source: PubMed Central journal article supplement (PMC7809702)

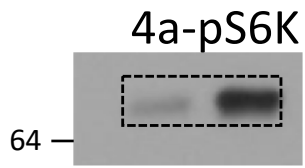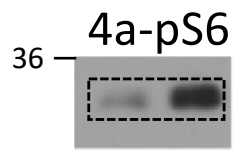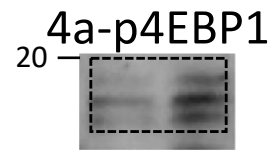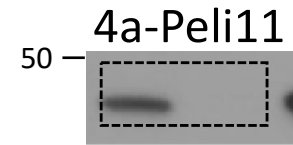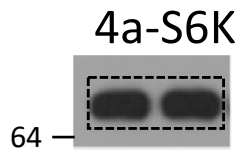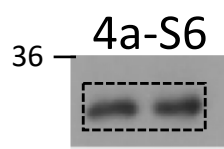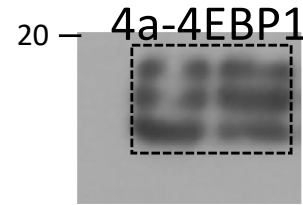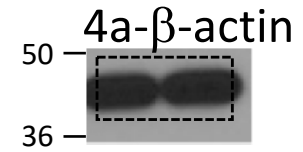

4b-pS6K T389

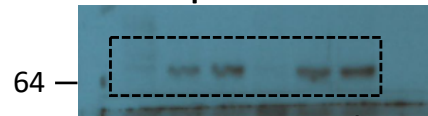

4b-pS6K T421/S424

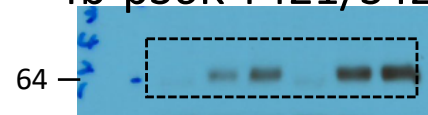

4b-pAKT S473

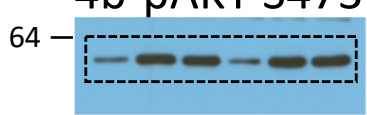

4b-AKT

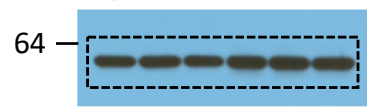

4b-S6K

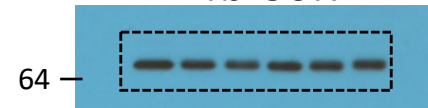

4b-pS6

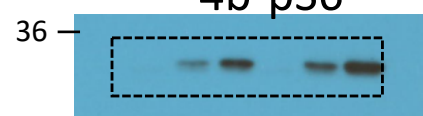

4b-S6

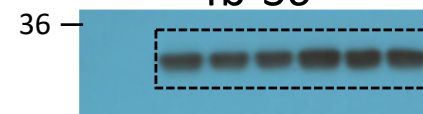

4b-Peli1

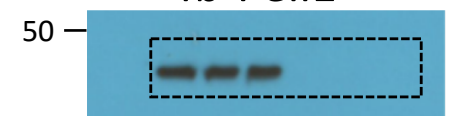

4b- $\beta$ -actin

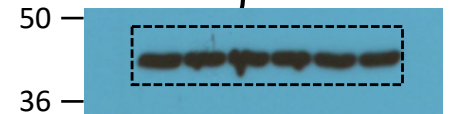

4c-pS6K

T389

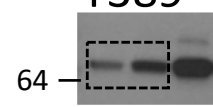

T421/S424

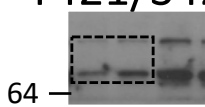

4c-S6K

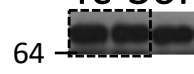

4c-pS6

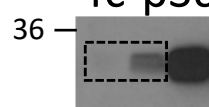

4c-Peli1

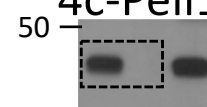

4c- $\beta$ -actin

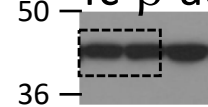

4f-pS6K

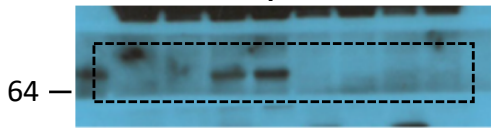

4f-pS6

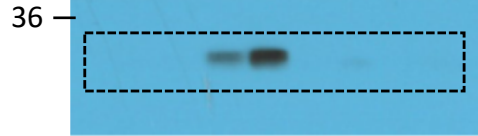

4f-p4EBP1

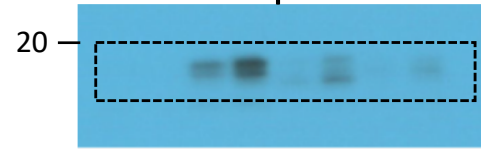

4f-Peli1

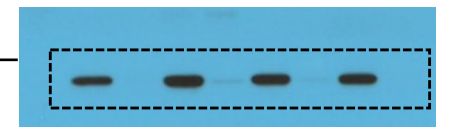

4f-S6K

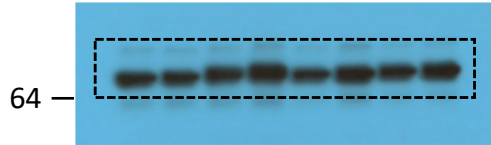

4f-S6

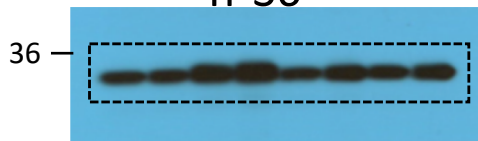

4f-4EBP1

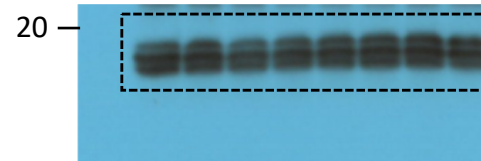

4f-β-actin

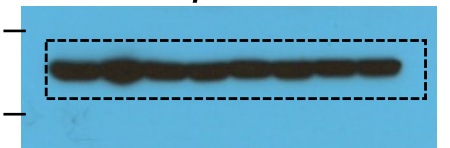

4g-Hif1α

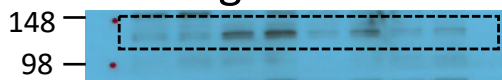

4g-HK1

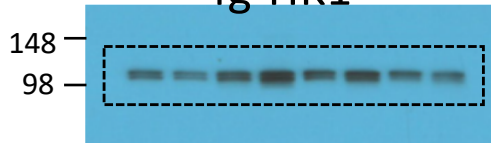

4g-c-myc

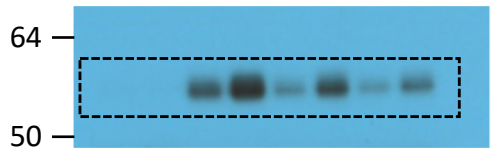

4g-HK2

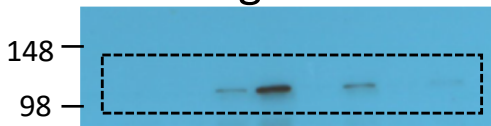

4g-Glut1

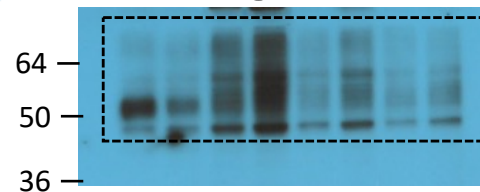

4g-β-actin

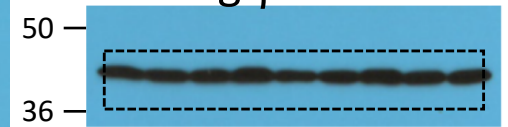

Supplement: EMBJ-40-e104532-s004.pdf [file EMBJ-40-e104532-s004.pdf]
