# Supplementary material
Source: PubMed Central journal article supplement (PMC7809702)
Supplement: EMBJ-40-e104532-s001.pdf [file EMBJ-40-e104532-s001.pdf]

# **Peli1 regulates T cell metabolism and antitumor immunity by regulating mTORC1 activation**

**Chun-Jung Ko, Lingyun Zhang, Zuliang Jie, Lele Zhu, Xiaofei Zhou, Xiaoping Xie, Tianxiao Gao, Xuhong Cheng, and Shao-Cong Sun**

## **Appendix**

|                            |           |
|----------------------------|-----------|
| <b>Appendix Figure S1:</b> | <b>2</b>  |
| <b>Appendix Figure S2:</b> | <b>3</b>  |
| <b>Appendix Figure S3:</b> | <b>4</b>  |
| <b>Appendix Figure S4:</b> | <b>5</b>  |
| <b>Appendix Figure S5:</b> | <b>6</b>  |
| <b>Appendix Figure S6:</b> | <b>7</b>  |
| <b>Appendix Table S1:</b>  | <b>8</b>  |
| <b>Appendix Table S2:</b>  | <b>9</b>  |
| <b>Appendix Table S3:</b>  | <b>10</b> |

## Appendix Figures

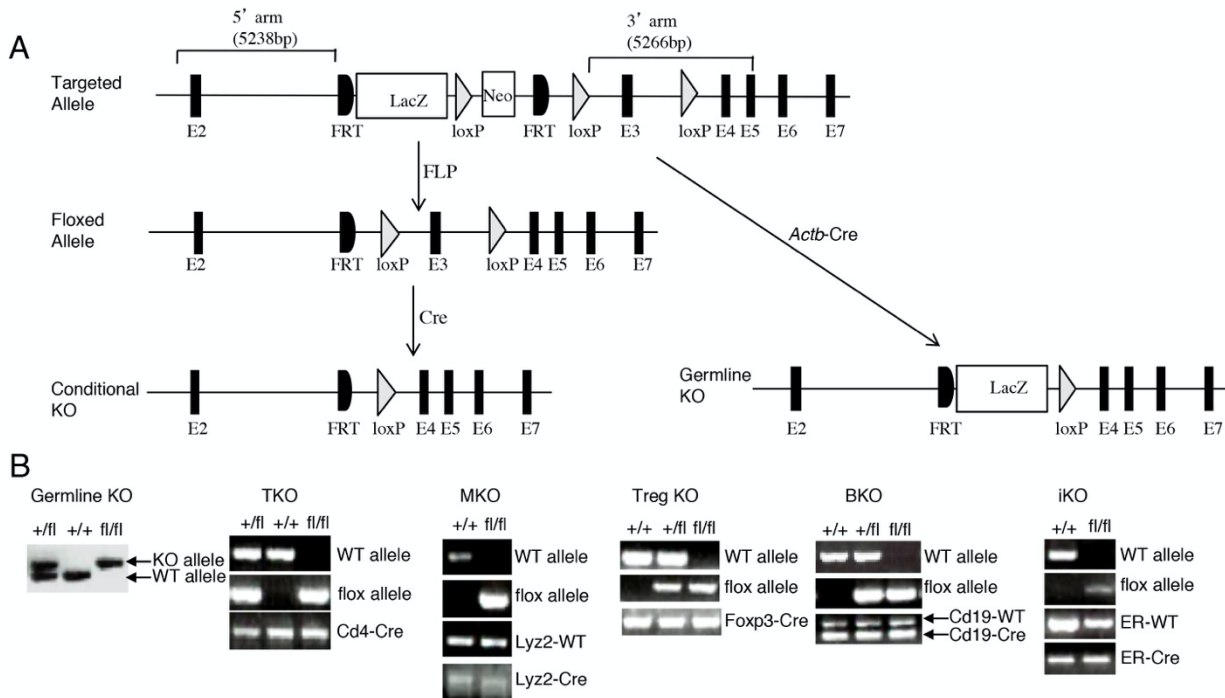

### Appendix Figure S1. Generation of *Pelil* germline KO and conditional KO mice.

Schematic picture of *Pelil* gene targeting (A) and genotyping PCR analyses (B) of the generated mice. Mice carrying the *Pelil* targeted allele were crossed with FLP deleter (*Rosa26-FLPe*) mice to generate *Pelil-flox* mice, which were further crossed with *Cd4-Cre*, *Lyz2-Cre*, *Foxp3-Cre*, *Cd19-Cre*, and *CreER* mice to generate T cell-conditional KO (TKO), myeloid cell-conditional KO (MKO), Treg cell-conditional (Treg KO), B cell-conditional (BKO), and tomoxifen-inducible KO (iKO) mice, respectively. *Pelil* germline KO mice (obtained from KOMP) were created by crossing *Pelil*-targeted mice with *Actb-Cre* mice.

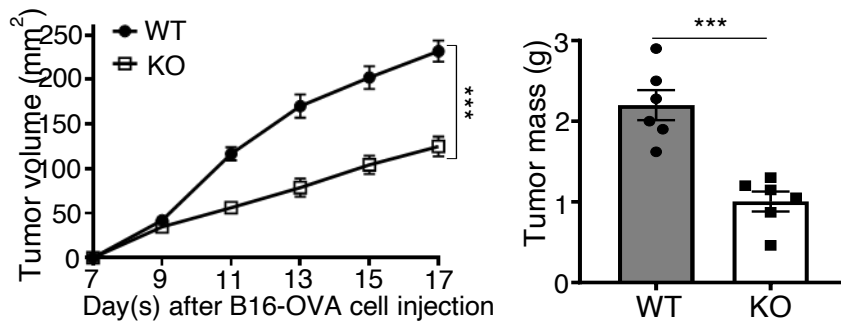

**Appendix Figure S2. *Pel1* deficiency suppresses tumor growth.**

Tumor growth curve (left) and summary of end-point tumor masses (right) of 6-8 week-old wildtype (WT) and *Pel1*-KO (KO) mice inoculated s.c. with B16-OVA tumor cells. Data are presented as mean±SEM with P values being determined by a two-way ANOVA analysis with Bonferroni correction (left panel) and two-tailed unpaired Student's t-test (right panel). \*\*\*P<0.001.

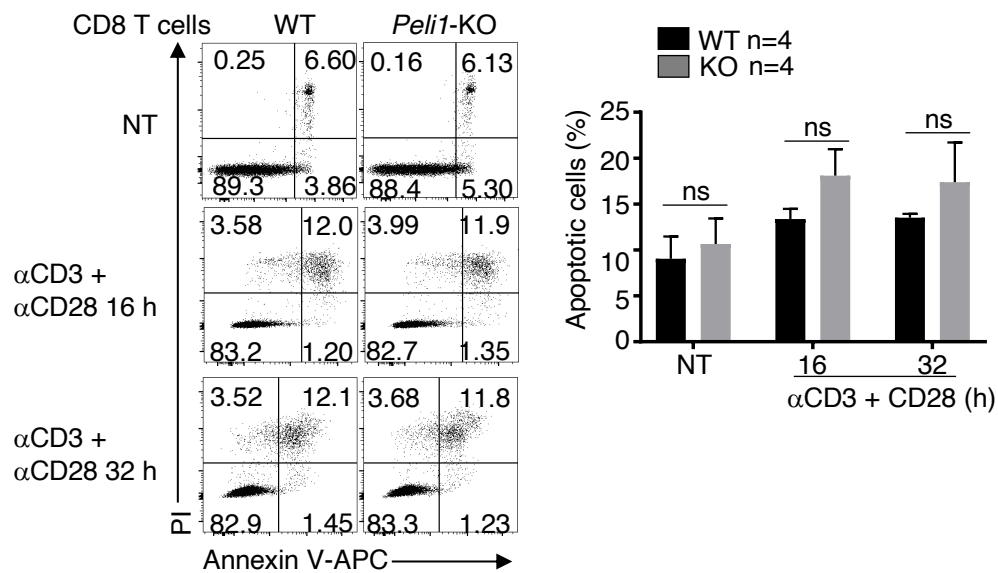

**Appendix Figure S3. Effect of *Peli1* deficiency on apoptosis induction.**

Flow cytometric analysis of apoptotic cells in wildtype (WT) or *Peli1*-KO (KO) CD8 T cells stimulated with anti-CD3 plus anti-CD28 for the indicated time points. Data are presented as representative FACS plot or summary graph based on 4 different pairs of mice. P values were determined by two-tailed unpaired Student's t-test. ns, not significant.

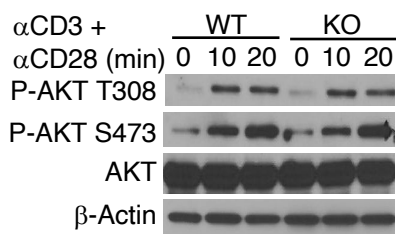

**Appendix Figure S4. Dispensable role of Peli1 in AKT regulation.**

Immunoblot analysis of AKT phosphorylation at serine 473 (S473) and threonine 308 (T308), total AKT expression level, and loading control  $\beta$ -Actin expression level in whole-cell lysates of wildtype (WT) and Peli1-KO (KO) OT-I CD8 T cells, stimulated with anti-CD3 plus anti-CD28 for the indicated time points.

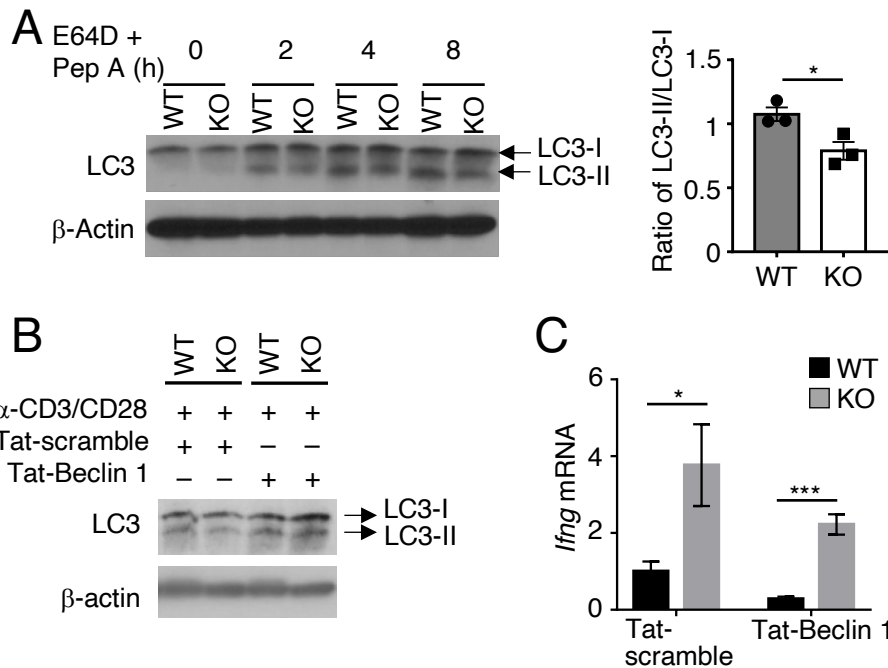

**Appendix Figure S5. Autophagy is partially involved in the hyper-induction of IFN $\gamma$  in Peli1-deficient CD8 T cells.**

**A.** Immunoblot analysis of LC3 in wildtype (WT) and Peli1-KO (KO) CD8 T cells that were activated for 2 h with plate-bound anti-CD3 and anti-CD28 and then treated for the indicated time points with lysosomal protease inhibitors, E64D (10  $\mu$ g/ml) and pepstatin (10  $\mu$ g/ml). Data are presented as a representative plot (left panel) and a summary graph of LC3-II/LC3-I ratio based on the 8 h time point of E64D/PepA treatment.

**B,C.** Immunoblot analysis of LC3 (**b**) and qRT-PCR analysis of *Ifng* induction (**c**) in wildtype (WT) and Peli1-KO (KO) CD8 T cells that were activated for 2 h with anti-CD3 and anti-CD28 and then treated for additional 6 h with the autophagy-stimulating peptide Tat-Beclin 1 or the Tat-scrambled control peptide (Tat-scr). P values were determined by two-tailed unpaired Student's t-test. \*P<0.05; \*\*\*P<0.001.

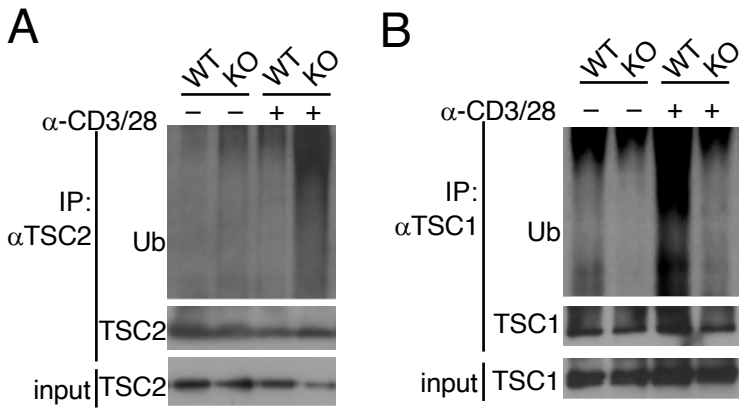

**Appendix Figure S6. Ubiquitination of TSC2 and TSC1 in CD8 T cells.**

TSC2 (A) and TSC1 (B) were immunoprecipitated from wildtype (WT) or Peli1-KO (KO) naïve CD8 T cells that were either untreated (-) or stimulated for 2h with anti-CD3 plus anti-CD28 (+) and subjected to immunoblotting using anti-ubiquitin (Ub) and anti-TSC2 or anti-TSC1. Cell lysates (input) were also subjected to immunoblotting using anti-TSC2 or anti-TSC1.

## Appendix Tables

**Appendix Table S1. Primers for mouse genotyping**

| Mice         | Primer Sequence (5' to 3')                                               | Amplicon |
|--------------|--------------------------------------------------------------------------|----------|
| Peli1 KO     |                                                                          |          |
| WT allele    | Forward GCTTCCTGGGTGTGTGATACATGC<br>Reverse GGATCTGTCTGGCTATGTTTTGAACC   | 425 bp   |
| KO allele    | Forward GCTACCATTACCAGTTGGTCTGGTGTC<br>Reverse AGAGAAATTCCAAGGCAAAATGAGG | 560 bp   |
| Peli1 flox   |                                                                          |          |
| WT allele    | Forward TGAGTGTAGGGTTAATTGACGTAG<br>Reverse AGTCCTAACTACCTGAATAGAGCAC    | 249 bp   |
| Flox         | Forward TGAGTGTAGGGTTAATTGACGTAG<br>Reverse TGC GACTATAGAGATATCAACCAC    | 500 bp   |
| Cd4-Cre      | Forward CCCAACCAACAAGAGCTC<br>Reverse CCCAGAAATGCCAGATTACG               | 600 bp   |
| Lyz2-Cre     |                                                                          |          |
| WT allele    | Forward CTTGGGCTGCCAGAATTTCTC<br>Reverse TTACAGTCGGCCAGGCTGAC            | 350 bp   |
| Cre allele   | Forward CTTGGGCTGCCAGAATTTCTC<br>Reverse CCCAGAAATGCCAGATTACG            | 700 bp   |
| Cd19-Cre     |                                                                          |          |
| WT allele    | Forward AGAGGGAGGCAATGTTGTGC<br>Reverse GTCCAGGTCCTGACGTCTG              | 588 bp   |
| Cre allele   | Forward AGAGGGAGGCAATGTTGTGC<br>Reverse GACGATGAAGCATGTTTAGCTGG          | 420 bp   |
| Foxp3-Cre    | Forward ACGTAAACGGCCACAAGTTCAGC<br>Reverse GTCGCCGATGGGGGTGTTCT          | 509 bp   |
| Rosa CreER   |                                                                          |          |
| WT allele    | Forward AAAGTCGCTCTGAGTTGTTAT<br>Reverse GGAGCGGGAGAAATGGATATG           | 650 bp   |
| CreER allele | Forward AAAGTCGCTCTGAGTTGTTAT<br>Reverse CCTGATCCTGGCAATTTTCG            | 825 bp   |



**Appendix Table S2. Primers for human TSC1 site-directed mutagenesis**

| Mutation | Primers (5' to 3')                                                         |
|----------|----------------------------------------------------------------------------|
| K30A     | Forward ACAGCTGTCTTTGCAGAGAACCTCAAT<br>Reverse ATTGAGGTTCTCTGCAAAGACAGCTGT |
| K632A    | Forward TTAAAGAAAGCAGCAGGAAACACAGAG<br>Reverse CTCTGTGTTTCCTGCTGCTTTCTTTAA |

**Appendix Table S3. Gene-specific primers for qRT-PCR analysis of mouse gene expression**

| Gene         | Primers (5' to 3')                                                | Amplicon |
|--------------|-------------------------------------------------------------------|----------|
| <i>Tsc1</i>  | Forward ACTCTCCCTTCTACCGAGACA<br>Reverse GAGGCTGCCGAATGAGTCTTC    | 61 bp    |
| <i>Tsc2</i>  | Forward TGCCGCAGCATCAGTGTATC<br>Reverse TGCCAGGAGGAACTCTCCC       | 231 bp   |
| <i>Hk2</i>   | Forward GATCGCCGGATTGGAACAGA<br>Reverse GGTCTAGCTGCTTAGCGTCC      | 97 bp    |
| <i>Glut1</i> | Forward GCTGTGCTTATGGGCTTCTC<br>Reverse CACATACATGGGCACAAAGC      | 114 bp   |
| <i>Hif1a</i> | Forward AAGTGGCAACTGATGAGCAA<br>Reverse GCGGAGAACGAGAAGAAAA       | 123 bp   |
| <i>Myc</i>   | Forward AAACGACAAGAGGGCGGACAC<br>Reverse TGGTCACGCAGGGCAAAA       | 84 bp    |
| <i>Pgk1</i>  | Forward TGTCGCTTTCCAACAAGCTG<br>Reverse GCTCCATTGTCCAAGCAGAAT     | 163 bp   |
| <i>Eno1</i>  | Forward TGCGTCCACTGGCATCTAC<br>Reverse CAGAGCAGGCGCAATAGTTTTA     | 118 bp   |
| <i>Pfkip</i> | Forward GAAACATGAGGCGTTCTGTGT<br>Reverse CCCGGCACATTGTTGGAGA      | 66 bp    |
| <i>Pkm</i>   | Forward GCCGCCTGGACATTGACTC<br>Reverse CCATGAGAGAAATTCAGCCGAG     | 145 bp   |
| <i>Aldoa</i> | Forward GCGCCTTTAAATGTCCGGG<br>Reverse TAGGGTCACCAGAACCTCGT       | 103 bp   |
| <i>Pel1l</i> | Forward CGTGAAACCAGATCAGCTCAGC<br>Reverse GAGCTGCATTGATCTCCTGTCTT | 181 bp   |
| <i>Ifng</i>  | Forward CAGCAACAGCAAGGCGAAA<br>Reverse CTGGACCTGTGGGTTGTTGAC      | 73 bp    |
| <i>Actb</i>  | Forward CGTGAAAAGATGACCCAGATCA<br>Reverse CACAGCCTGGATGGCTACGT    | 72 bp    |
