# Supplementary material
Source: PubMed Central journal article supplement (PMC7809702)

Fig 3

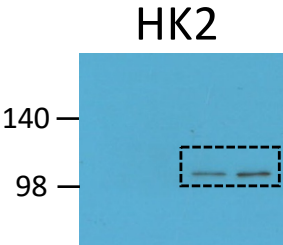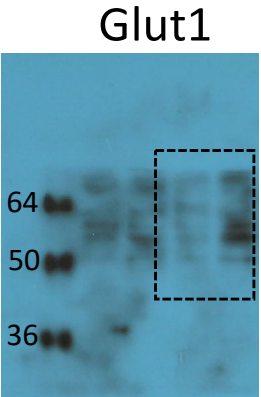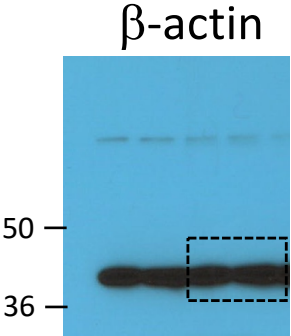

Supplement: EMBJ-40-e104532-s003.pdf [file EMBJ-40-e104532-s003.pdf]

Fig5

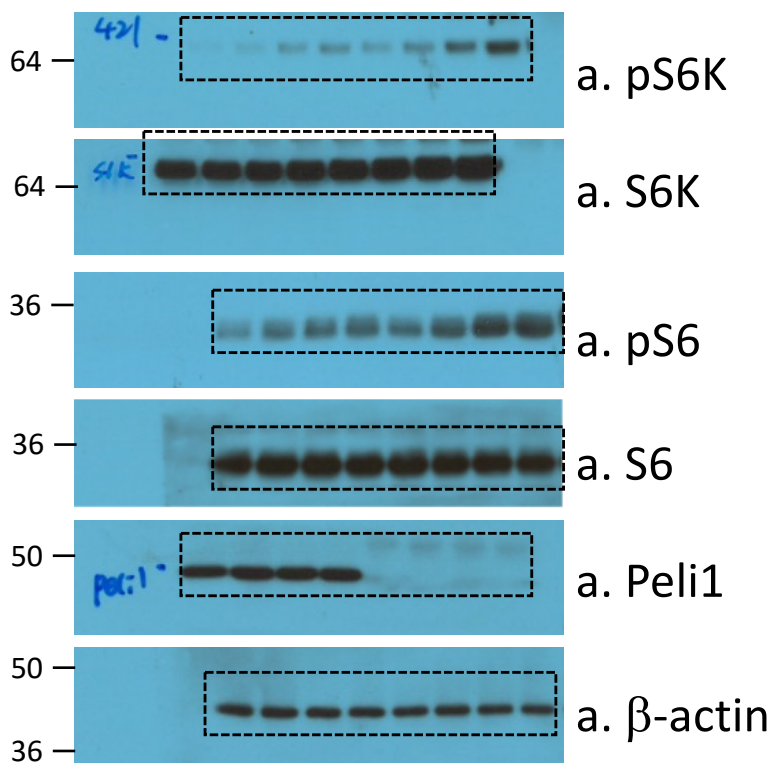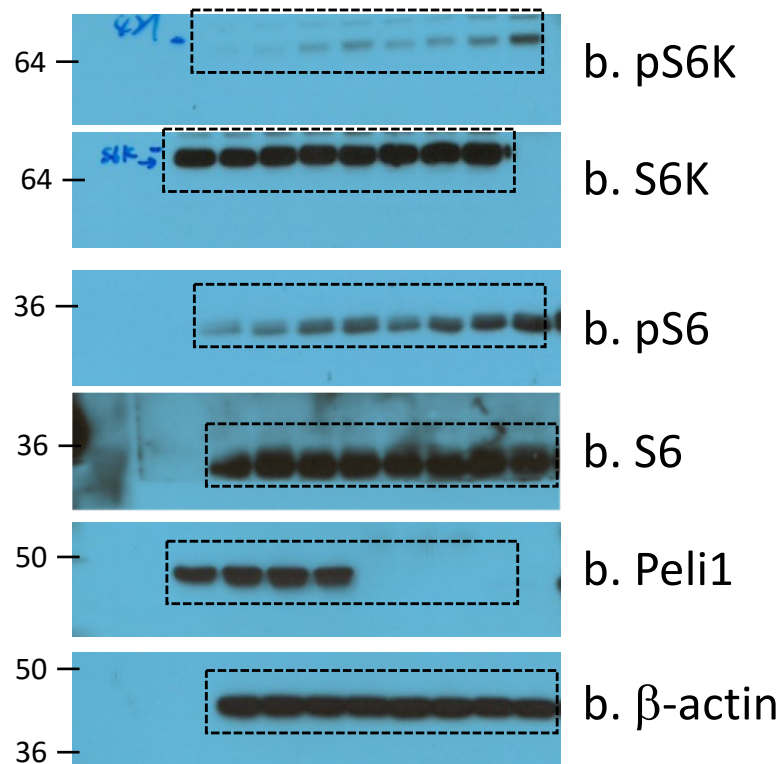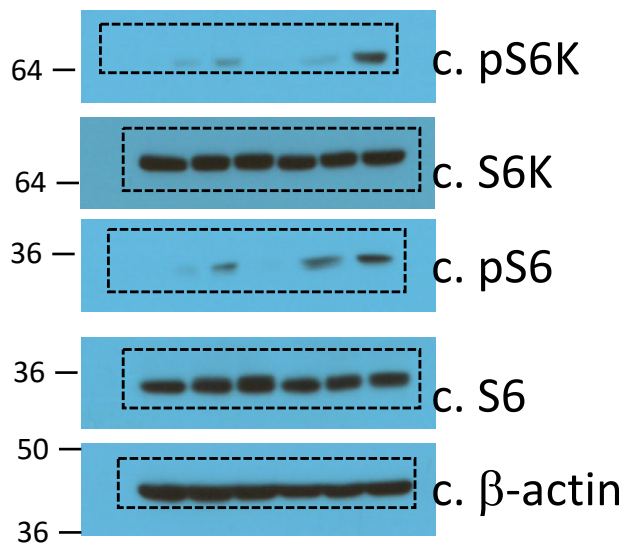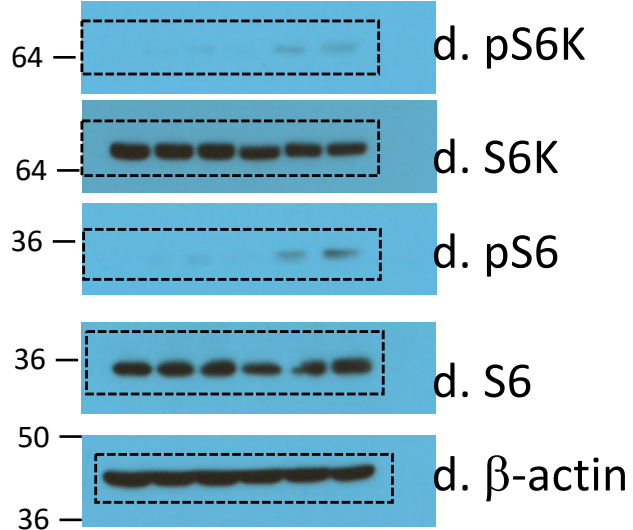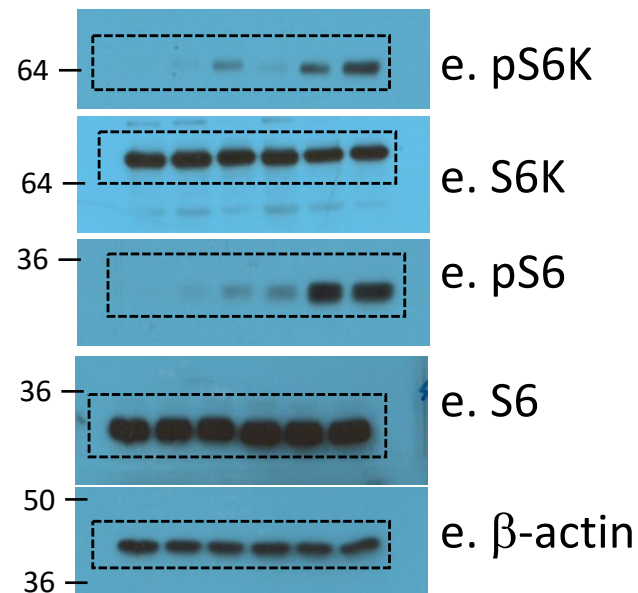

Supplement: EMBJ-40-e104532-s005.pdf [file EMBJ-40-e104532-s005.pdf]

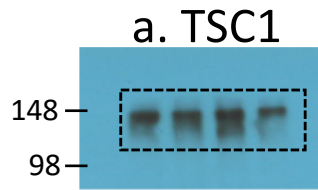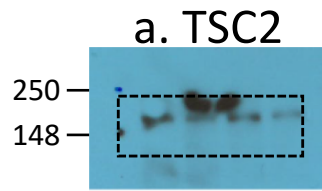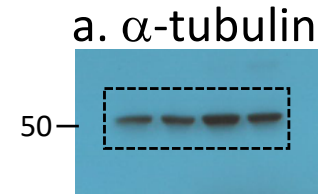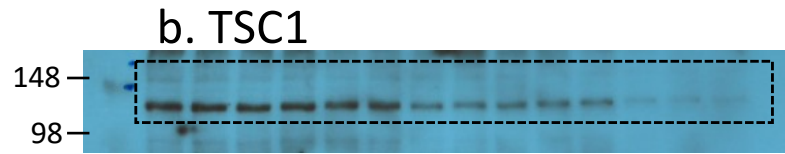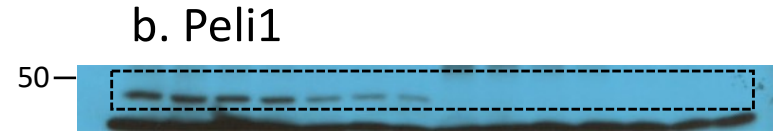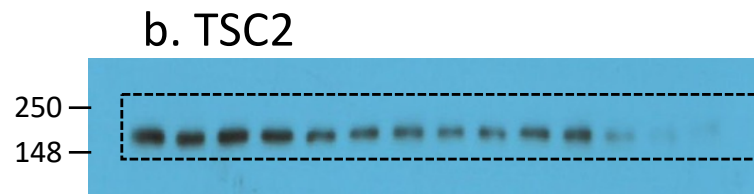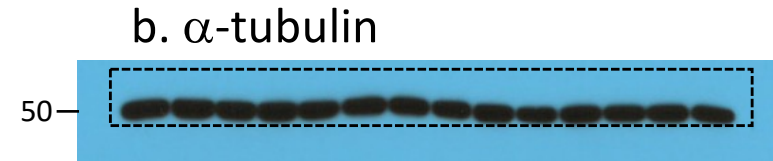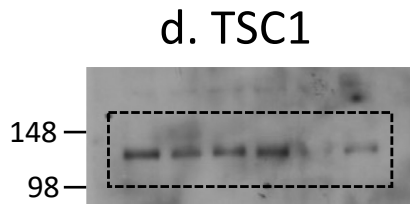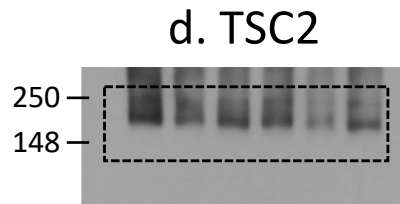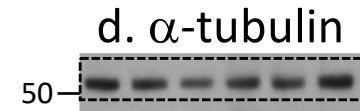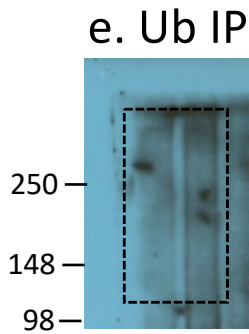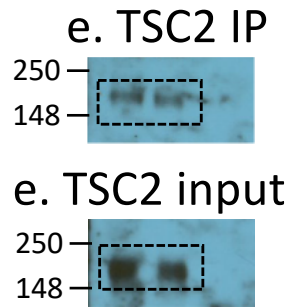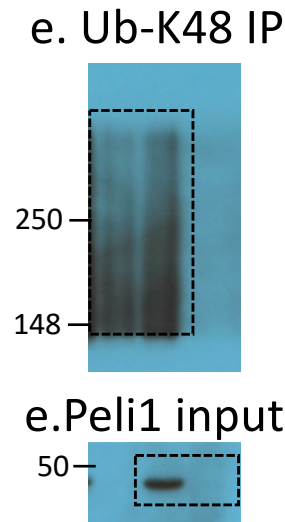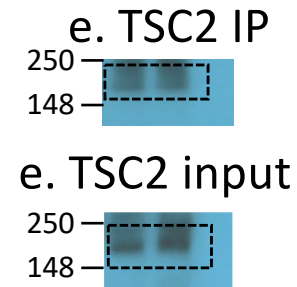

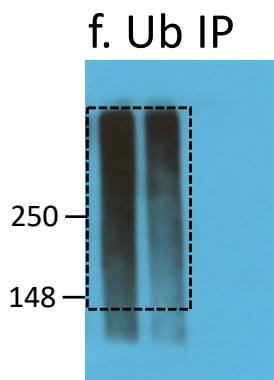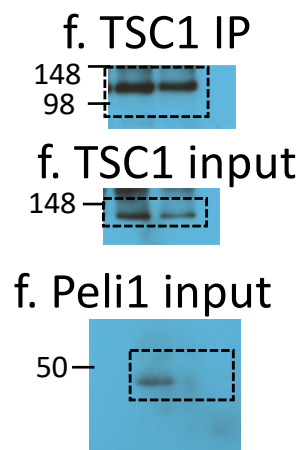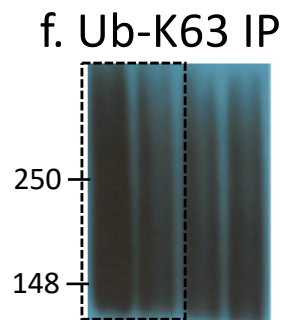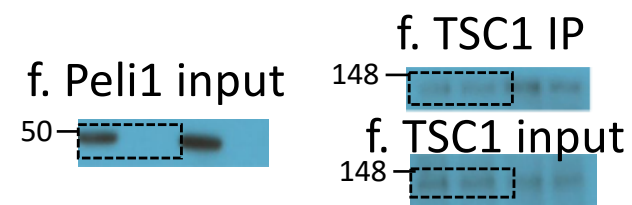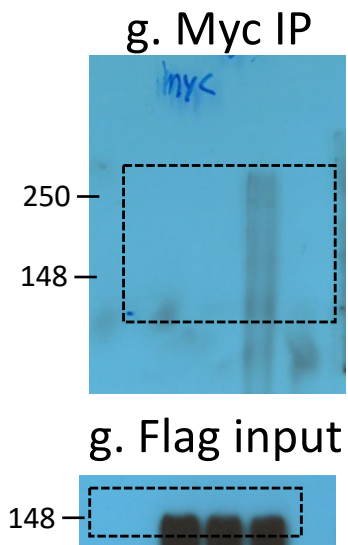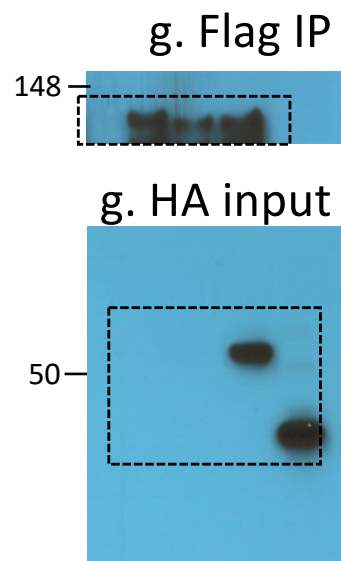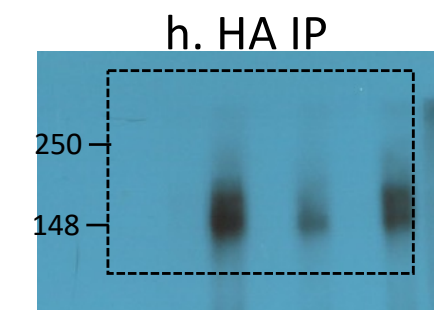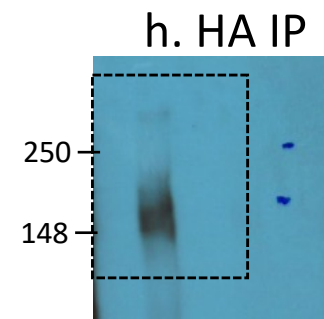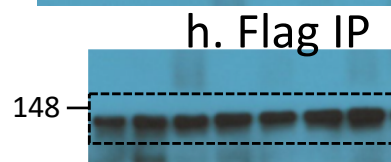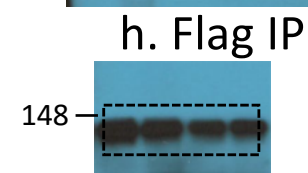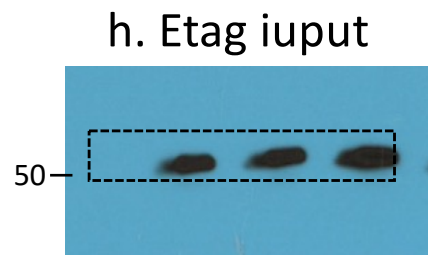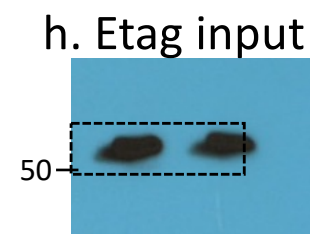

Fig6

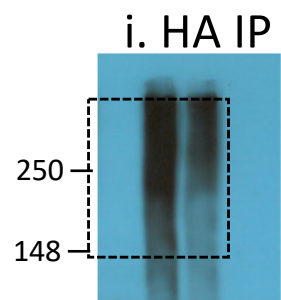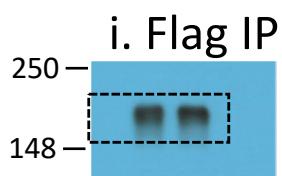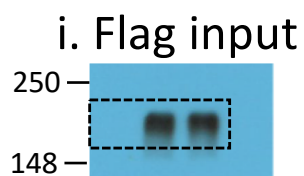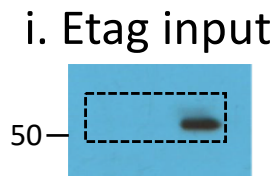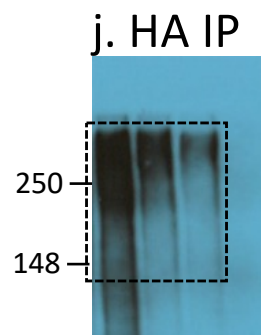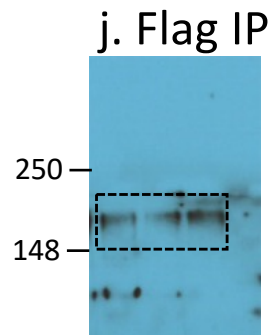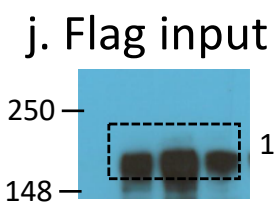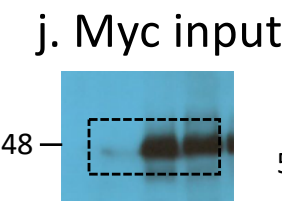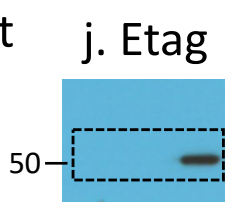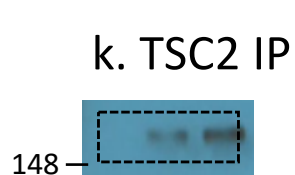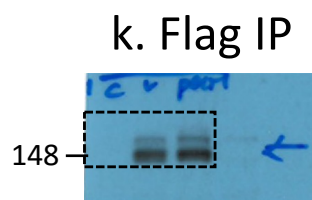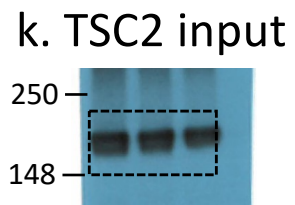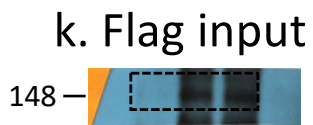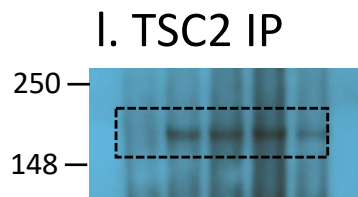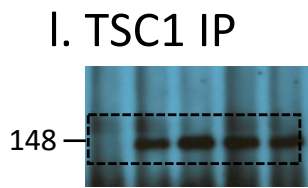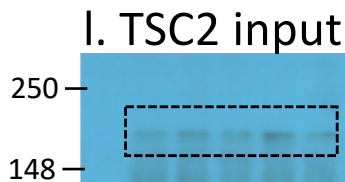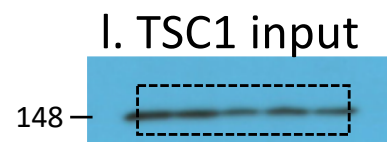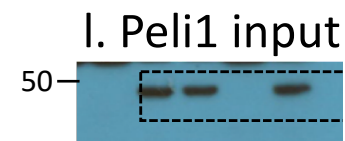

Supplement: EMBJ-40-e104532-s006.pdf [file EMBJ-40-e104532-s006.pdf]

Fig 7

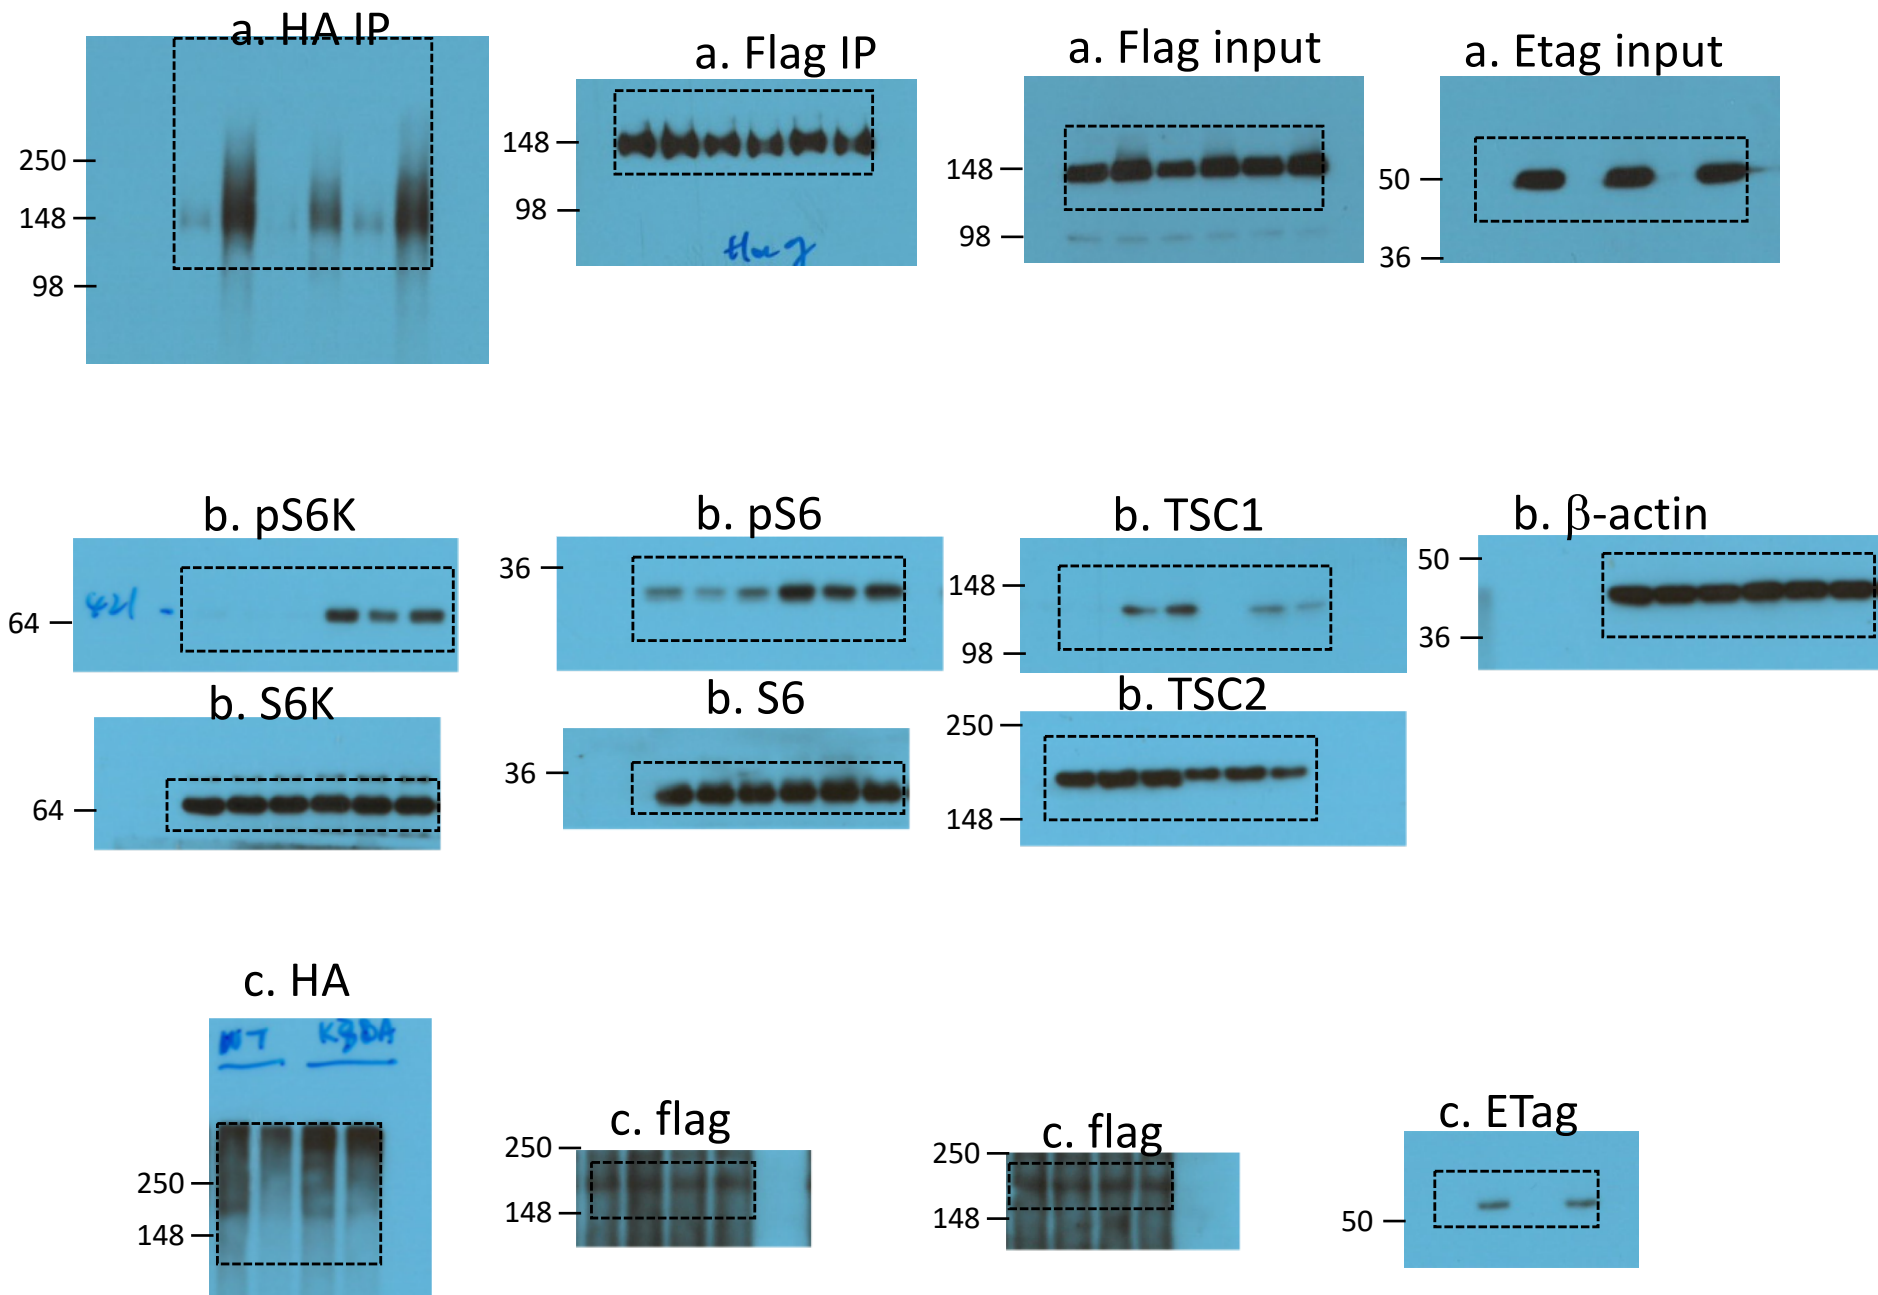

Fig 7

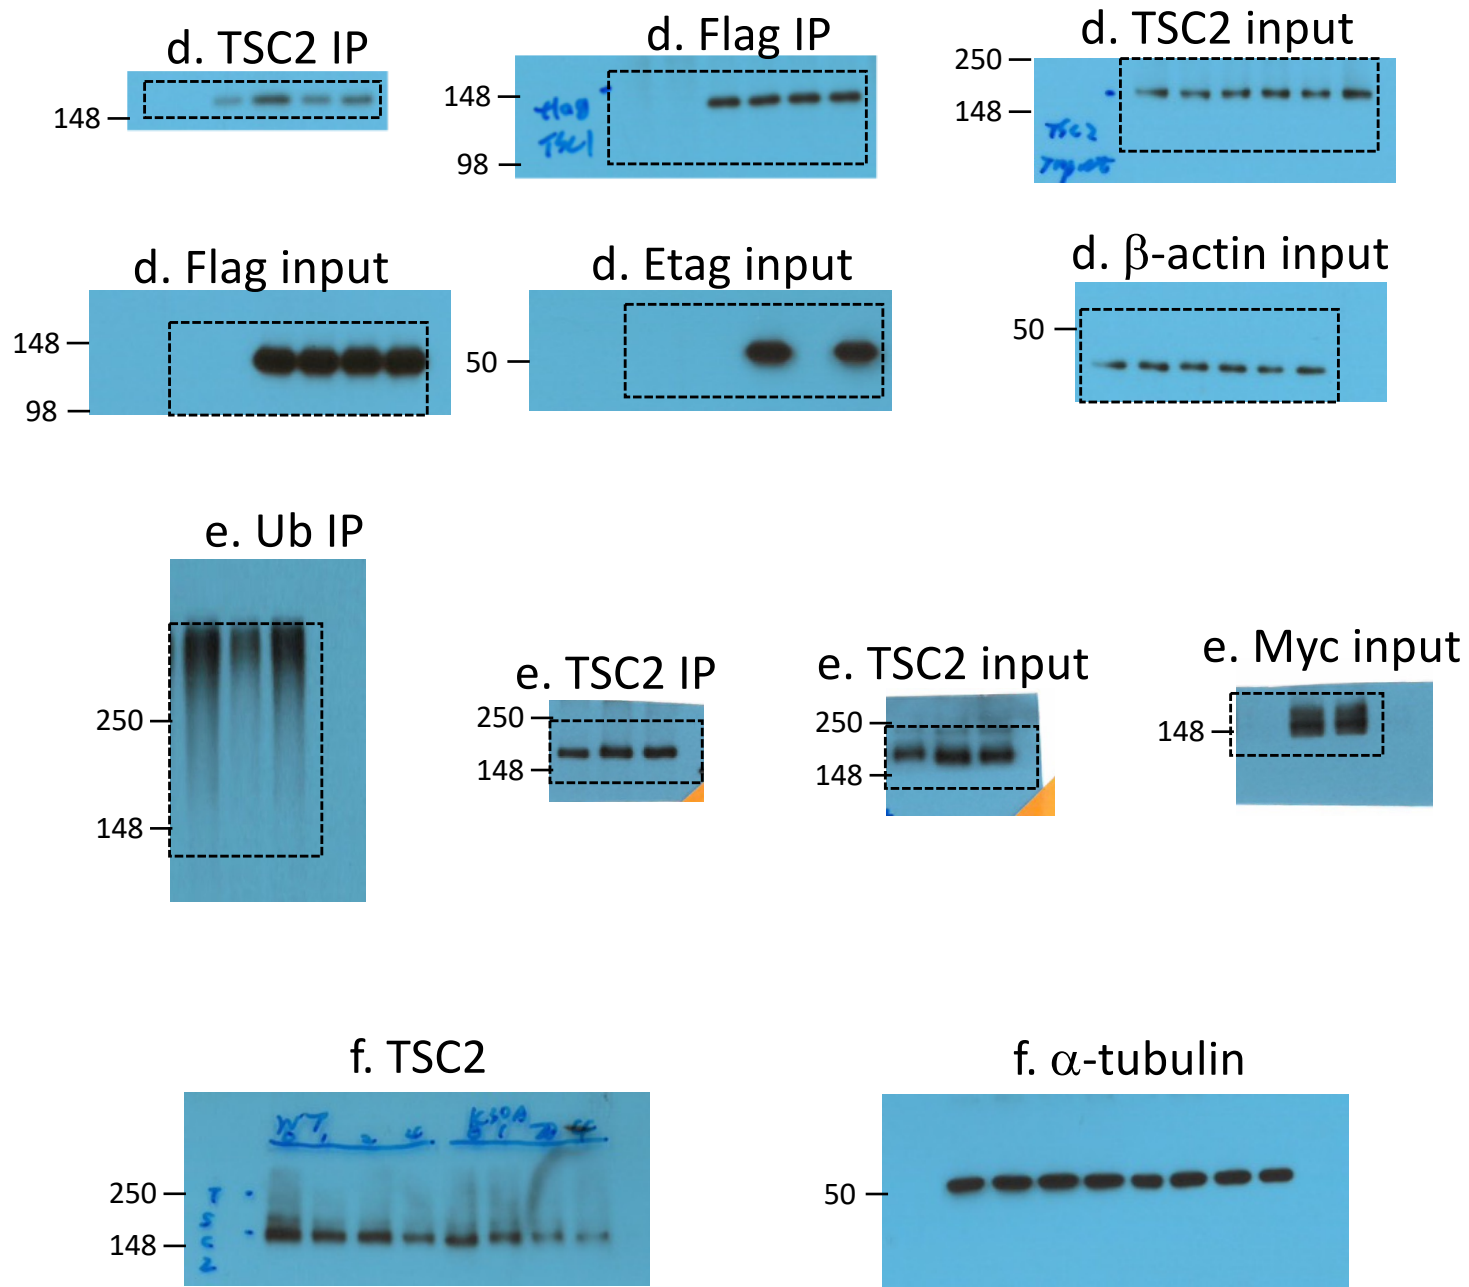

Supplement: EMBJ-40-e104532-s007.pdf [file EMBJ-40-e104532-s007.pdf]
